# Supplementary material for: Vascular Regeneration in Ischemic Hindlimb by Adeno‐Associated Virus Expressing Conditionally Silenced Vascular Endothelial Growth Factor
Source: PubMed Central journal article supplement — J Am Heart Assoc. 2016 May 26;5(6):e001815. doi: 10.1161/JAHA.115.001815 (PMC4937238; doi:10.1161/jaha.115.001815), 2016-05-26
Supplement: JAH3-5-e001815-s001.pdf [file JAH3-5-e001815-s001.pdf]

## **SUPPLEMENTAL MATERIAL**

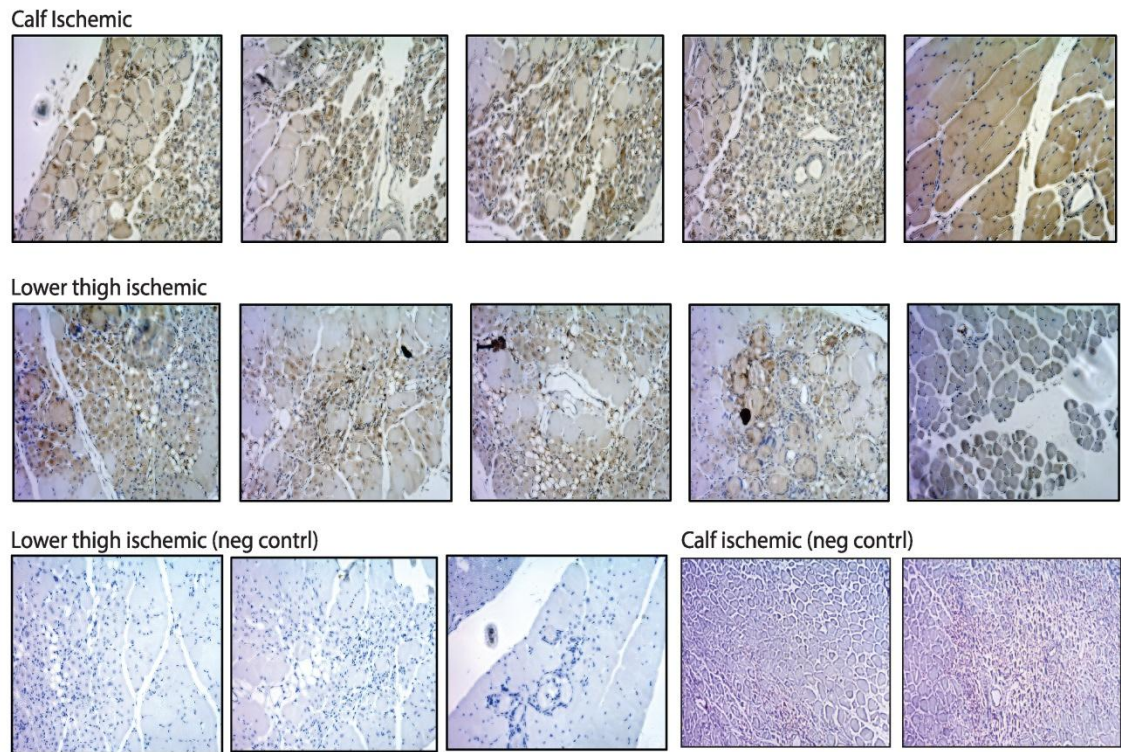

**Figure Legend:**

**Figure S1.** Representative sections of ischemic calf and lower thigh muscle as indicated stained using a Hypoxyprobe kit as described in Methods and Legend for Figure 2. Bottom panels are negative controls lacking primary antibody.
